# Supplementary material
Source: PubMed Central journal article supplement (PMC10527164)
Supplement: NIHMS1910425-supplement-Supplementary_Material.pdf [file NIHMS1910425-supplement-Supplementary_Material.pdf]

**Supplemental Table 1.** Phage proteins identified by Mascot in the tryptic digests of the phage gel bands that reacted with glycostain as shown in Figure 1.

Table S1. Phage proteins identified by Mascot in the tryptic digests of the phage gel bands that reacted with glycostain as shown in Figure 1.

| Gel Band | Gene | MW (kDa) | Mascot Protein Score | Function <sup>1</sup>        | C-terminal seq. |
|----------|------|----------|----------------------|------------------------------|-----------------|
| Che8     | 6    | 29.0     | 27602                | Major Capsid protein         | ...NKTGS        |
| Che8     | 11   | 29.9     | 1380                 | Major Tail Subunit protein   | ...YSDGS        |
| Che8     | 17   | 29.1     | 969                  | Minor Tail Protein           | ...VLPLS        |
| Che8     | 24   | 21.6     | 128                  | Minor Tail Protein           | ...YVVVP        |
| Che8     | 4    | 27.7     | 52                   | Capsid Maturation Protease   | ...RSIQR        |
| Che8     | 18   | 36.5     | 42                   | Minor Tail Protein           | ...GAVDD        |
| Che8     | 27   | 10.4     | 27                   | Hypothetical protein         | ... TTEPW       |
| Che8     | 51   | 7.9      | 23                   | Hypothetical protein         | ... MRETR       |
| Corndog  | 49   | 29.9     | 6779                 | Major Tail Subunit protein   | ...IKGDS        |
| Corndog  | 34   | 45.5     | 803                  | Portal protein               | ...SGGGV        |
| Corndog  | 60   | 29.6     | 207                  | Minor Tail protein           | ...VQPIP        |
| Corndog  | 43   | 22.4     | 79                   | Head-to-Tail Adapter protein | ...CVEFL        |
| Corndog  | 58   | 63.5     | 55                   | Minor Tail protein           | ...RRWPM        |
| Corndog  | 115  | 7.5      | 31                   | Hypothetical protein         | ---LAVRR        |
| Myrna    | 99   | 37.4     | 6279                 | Major Capsid protein         | ...ILRKA        |
| Myrna    | 98   | 19.0     | 1189                 | Hypothetical protein         | ...LAGGS        |
| Myrna    | 111  | 31.5     | 494                  | Putative tail fibre          | ...VVWKL        |
| Myrna    | 132  | 105.6    | 237                  | Lysin A                      | ...YSWMY        |
| Myrna    | 122  | 53.1     | 207                  | Tail Sheath protein          | ...TDTAI        |
| Myrna    | 121  | 26.7     | 216                  | Hypothetical protein         | ...RFDWQ        |
| Myrna    | 239  | 119.1    | 182                  | Capsid Decoration protein    | ...VVVMG        |
| Myrna    | 117  | 59.4     | 150                  | Hypothetical protein         | ...TYTGP        |
| Myrna    | 241  | 27.8     | 121                  | Hypothetical protein         | ...VFPGF        |
| Myrna    | 137  | 50.1     | 116                  | Hypothetical protein         | ...NFVRS        |
| Myrna    | 78   | 54.6     | 58                   | Hypothetical protein         | ...GVVHP        |
| Myrna    | 138  | 141.7    | 39                   | Hypothetical protein         | ...PHYLK        |
| Myrna    | 3    | 32.8     | 27                   | Nucleotidyltransferase       | ... ANGPD       |
| Myrna    | 98   | 19.0     | 2058                 | Minor capsid protein         | ...LAGGS        |
| Myrna    | 99   | 37.4     | 781                  | Major Capsid protein         | ...ILRKA        |
| Myrna    | 138  | 141.7    | 662                  | Hypothetical protein         | ...PHYLK        |
| Myrna    | 131  | 22.5     | 514                  | Hypothetical protein         | ... PAVGR       |
| Myrna    | 137  | 50.1     | 494                  | Hypothetical protein         | ...NFVRS        |
| Myrna    | 121  | 26.7     | 424                  | Hypothetical protein         | ...RFDWQ        |
| Myrna    | 117  | 59.4     | 371                  | Hypothetical protein         | ...TYTGP        |
| Myrna    | 242  | 25.6     | 274                  | Hypothetical protein         | ... ARTAL       |
| Myrna    | 129  | 26.9     | 271                  | Hypothetical protein         | ... PTPGR       |
| Myrna    | 241  | 27.8     | 236                  | Hypothetical protein         | ...VFPGF        |
| Myrna    | 239  | 119.1    | 190                  | Capsid Decoration protein    | ...VVVMG        |
| Myrna    | 240  | 47.4     | 86                   | Hypothetical protein         | ... MAVPA       |
| Myrna    | 118  | 36.9     | 80                   | Hypothetical protein         | ... TGDAR       |
| Myrna    | 122  | 76       | 53.1                 | Tail Sheath protein          | ...TDTAI        |
| Myrna    | 133  | 34.2     | 63                   | Hypothetical protein         | ... RAVLN       |
| Myrna    | 97   | 129.8    | 38                   | Hypothetical protein         | ... SLMFG       |
| Myrna    | 111  | 31.5     | 31                   | Putative Tail Fibre          | ...VVWKL        |
| Myrna    | 255  | 29.9     | 23                   | Hypothetical protein         | ... PGDLN       |

<sup>1</sup>Protein functions are based on homology with other phage proteins in the NCBI nr protein database.

**Supplemental Table 2.** Che8 proteins identified by mass spectrometry following chymotrypsin digestion of proteins in Fig. 2D.

Table S2. Che8 proteins identified by mass spectrometry following chymotrypsin digestion of proteins in Fig. 2D.

| Gel Band # <sup>1</sup> | Gene # | Calc. M.W. (kDa) | Mascot Score <sup>2</sup> | Function <sup>3</sup>   | C-terminal seq. |
|-------------------------|--------|------------------|---------------------------|-------------------------|-----------------|
| Che8 band 1             | 6      | 29.05            | 4754                      | Major capsid            | ...NKTGS        |
| Che8 band 1             | 17     | 28.98            | 101                       | Minor Tail Protein      | ...VLPLS        |
| Che8 band 1             | 11     | 29.78            | 64                        | Tail tube               | ...YSDGS        |
| Che8 band 1             | 25     | 30.83            | 56                        | Hypothetical Protein    | ...VGITR        |
| Che8 band 1             | 52     | 7.47             | 23                        | DNA Binding protein     | ...EPRSA        |
| Che8 band 2             | 6      | 29.05            | 6957                      | Major capsid            | ...NKTGS        |
| Che8 band 2             | 17     | 28.98            | 84                        | Minor Tail Protein      | ...VLPLS        |
| Che8 band 2             | 11     | 29.78            | 63                        | Tail tube               | ...YSDGS        |
| Che8 band 2             | 24     | 21.55            | 20                        | Minor Tail protein      | ...YVVVP        |
| Che8 band 3             | 6      | 29.05            | 5098                      | Major capsid            | ...NKTGS        |
| Che8 band 3             | 11     | 29.78            | 56                        | Tail tube               | ...YSDGS        |
| Che8 band 4             | 6      | 29.05            | 7702                      | Major capsid            | ...NKTGS        |
| Che8 band 4             | 11     | 29.78            | 182                       | Tail tube               | ...YSDGS        |
| Che8 band 4             | 32     | 47.41            | 20                        | Lysin A                 | ...VKGKS        |
| Che8 band 4             | 21     | 36.70            | 18                        | Minor Tail protein      | ...PLNPV        |
| Che8 band 5             | 6      | 29.05            | 7469                      | Major capsid            | ...NKTGS        |
| Che8 band 5             | 11     | 29.78            | 306                       | Tail tube               | ...YSDGS        |
| Che8 band 5             | 21     | 36.70            | 63                        | Minor Tail protein      | ...PLNPV        |
| Che8 band 5             | 59     | 29.03            | 26                        | Hypothetical Protein    | ...QEVAE        |
| Che8 band 5             | 16     | 63.84            | 23                        | Minor Tail protein      | ...LSPQG        |
| Che8 band 5             | 15     | 63.40            | 17                        | Minor Tail protein      | ...RRYPM        |
| Che8 band 6             | 6      | 29.05            | 4654                      | Major capsid            | ...NKTGS        |
| Che8 band 6             | 11     | 29.78            | 130                       | Tail tube               | ...YSDGS        |
| Che8 band 7             | 6      | 29.05            | 3772                      | Major capsid            | ...NKTGS        |
| Che8 band 7             | 11     | 29.78            | 108                       | Tail tube               | ...YSDGS        |
| Che8 band 7             | 2      | 60.99            | 17                        | Terminase Large Subunit | ...PRRIY        |
| Che8 $\Delta$ 110-1     | 6      | 29.05            | 6513                      | Major capsid            | ...NKTGS        |
| Che8 $\Delta$ 110-1     | 11     | 29.78            | 805                       | Tail tube               | ...YSDGS        |
| Che8 $\Delta$ 110-1     | 24     | 21.44            | 35                        | Minor Tail Protein      | ...YVVVP        |
| Che8 $\Delta$ 110-1     | 59     | 29.03            | 26                        | Hypothetical Protein    | ...QEVAE        |

<sup>1</sup>Bands were excised as labeled in Figure 2D. The band from the Che8 $\Delta$ 110-1 is the major band from Figure 2C.

<sup>2</sup>The score designated by Mascot, reflecting both the number of peptides identified and quality of the match of the MS/MS fragment ions to the amino acid sequences, is shown.

<sup>3</sup>The putative functions of the proteins identified are shown.

**Supplemental Table 3.** Details of groups of mice used for the studies shown in Figure 4 and 5.

Table S3. Details of groups of mice used for the studies shown in Figure 4 and 5.

C57L/6J mouse study (Figs. 4, 5, S2, S3, S4)

| Group | # of mice | Sex of mice | Animal designators* | Age of mice | Inoculum                                    |
|-------|-----------|-------------|---------------------|-------------|---------------------------------------------|
| 1     | 3         | female      | 1-1, 1-2, 1-3       | 11 weeks    | 100 $\mu$ L PBS++ (mock)                    |
| 2     | 3         | male        | 2-1, 2-2, 2-3       | 10 weeks    | 1 $\mu$ g (100 $\mu$ L) wild type Che8      |
|       | 3         | female      | 2-4, 2-5, 2-6       | 10 weeks    | 1 $\mu$ g (100 $\mu$ L) wild type Che8      |
| 3     | 3         | male        | 3-1, 3-2, 3-3       | 10 weeks    | 1 $\mu$ g (100 $\mu$ L) Che8 $\Delta$ 110-1 |
|       | 2         | female      | 3-4, 3-5            | 10 weeks    | 1 $\mu$ g (100 $\mu$ L) Che8 $\Delta$ 110-1 |

IFN $\beta$ -EYFP reporter mouse (C57BL/6J background) study (Figs. S4, S5, S6, S7)

| Group | # of mice | Sex of mice | Animal designators* | Age of mice | Inoculum                                    |
|-------|-----------|-------------|---------------------|-------------|---------------------------------------------|
| 1     | 1         | female      | 1-1                 | 6 weeks     | 1 $\mu$ g (100 $\mu$ L) wild type Che8      |
|       | 4         | male        | 1-2, 1-3, 1-4, 1-5  |             |                                             |
| 2     | 1         | female      | 2-6                 | 6 weeks     | 1 $\mu$ g (100 $\mu$ L) Che8 $\Delta$ 110-1 |
|       | 4         | male        | 2-7, 2-8, 2-9, 2-10 |             |                                             |

\*Each animal was individually tracked through the studies. Some figures use the animal designators in the tables above to show time course responses for individual mice.

**Supplemental Table 4.** Non-Actinobacteriophages coding for two or more Glycosyltransferases supporting data shown in Fig. 6.

Table S4. Non-Actinobacteriophages coding for two or more Glycosyltransferases supporting data shown in Fig. 6.

| Phage               | Host            | Genome (bp) | Accession   | Coordinates <sup>1</sup>                                                                                 | Subtype <sup>2</sup>                                                   |
|---------------------|-----------------|-------------|-------------|----------------------------------------------------------------------------------------------------------|------------------------------------------------------------------------|
| ACG-2014f           | Synechococcus   | 228,143     | NC_026927.1 | 17316..18407<br>164077..164871<br>165637..166368<br>170033..170911<br>220090..220707                     | Group 1<br>Family 11<br>Family 6<br>Family 25<br>Family 2              |
| BCepSauron          | Burkholderia    | 262,653     | NC_049851.1 | c 21943..22635<br>203351..203692<br>c 237158..237586                                                     | Family 32<br>Family 36<br>Family A                                     |
| BCP8-2              | Bacillus        | 159,071     | NC_027355.1 | c 97556..97753<br>c 135238..135444                                                                       |                                                                        |
| Bellamy             | Synechococcus   | 204,930     | NC_047838.1 | 159088..159894<br>159891..160607<br>175169..176122<br>181292..182128                                     |                                                                        |
| Fnu1                | Fusobacterium   | 130,914     | NC_055035.1 | c 56733..56978<br>119268..119579                                                                         |                                                                        |
| P-SSM2              | Prochlorococcus | 252,407     | NC_006883.2 | 196236..196967<br>196964..197866<br>198463..199605<br>200233..201027<br>202494..203189<br>204709..205500 | Family 2<br>Family 2<br>Family 1<br>Family 11<br>Family 6<br>Family 25 |
| P-TIM68             | Prochlorococcus | 197,361     | NC_028955.1 | 159647..160543<br>162196..162996<br>172254..173051                                                       |                                                                        |
| S-CAM7              | Synechococcus   | 216,121     | NC_031927.1 | 17930..18910<br>141185..141934<br>165157..165951<br>168723..169460                                       | Group 1<br>Family 11<br>Family 25<br>Family 6                          |
| S-CAM9              | Synechococcus   | 174,830     | NC_031922.1 | 147673..148491<br>148488..149204<br>154597..155550                                                       |                                                                        |
| S-PRM1              | Synechococcus   | 144,311     | NC_055761.1 | c 65221..65421<br>65791..65994<br>68778..69596<br>69593..70309<br>75553..76506<br>76496..77260           |                                                                        |
| S-SM2               | Synechococcus   | 190,789     | NC_015279.1 | 159988..160836<br>161639..162454<br>162426..163289                                                       | Family 11<br>Family 11<br>Family 25                                    |
| S-SSM7              | Synechococcus   | 232,878     | NC_015287.1 | 206946..207755<br>207755..208681<br>209505..210362<br>210843..211652                                     | Family 11<br>Family 11<br>Family 11<br>Family 25                       |
| Sfl                 | Enterobacteria  | 38,389      | NC_027339.1 | c18227..19747<br>c19750..20670                                                                           | Family 2                                                               |
| vB_FspM_immuto_2-6A | Flavobacterium  | 160,410     | NC_055915.1 | 49172..50614<br>50617..51927<br>52406..53029<br>58798..59988                                             | RfaG<br>Family 2<br>WcaA                                               |

<sup>1</sup>Gene coordinates of predicted glycosyltransferases are shown. C denotes coding on the complementary strand

<sup>2</sup>Glycosyltransferase subtypes are shown where provided in genome annotations.



**Figure S1. NanoLC-MS/MS analysis of glycostain-reactive gel bands, related to Figures 1 and 2.** Glycopeptide mass spectra from the in-gel tryptic digests of the glycostain-reactive bands from **(A)** Corndog, **(B)** Che8 and **(C)** Myrna phages. MS/MS fragment spectra acquired on selected glycopeptide ions from each phage are presented in Figure 1. **D – J.** Glycopeptide mass spectra from the in-gel chymotryptic digest of seven glycostain-reactive bands in the high-resolution SDS-PAGE gel of Che8 proteins. These glycopeptide ions are all derived from the Major Capsid protein (gp6) and show a stepwise increase in mass corresponding to a HexNAc-Hex pair from one band to the next. The additional complexity associated with each ion group is due to partial methylation as well as non-covalent adduction by ammonia. The latter may be due to the presence of ammonium bicarbonate in the digest buffer. **K – M.** NanoLC-MS/MS analysis of the in-gel chymotryptic digests of Che8 glycoproteins. HCD-MS/MS spectra of the triply charged ions **(K)** at  $m/z$  1284.9 corresponding to the chymotryptic glycopeptide from the Major Capsid protein (gene 6) and **(L and M)** at  $m/z$  1687.3 and  $m/z$  1741.7, respectively, corresponding to glycopeptides from the Major Tail protein (gene 11). The amino acid sequence of the two glycopeptides from the Major Tail protein differ by an N-terminal tyrosine.

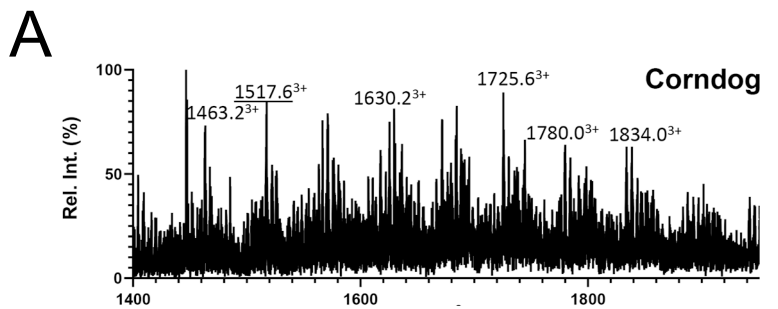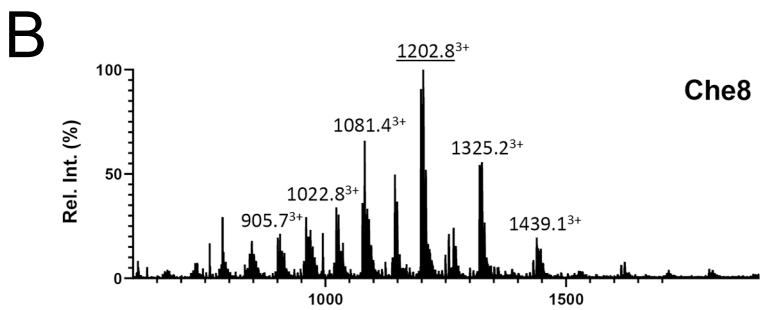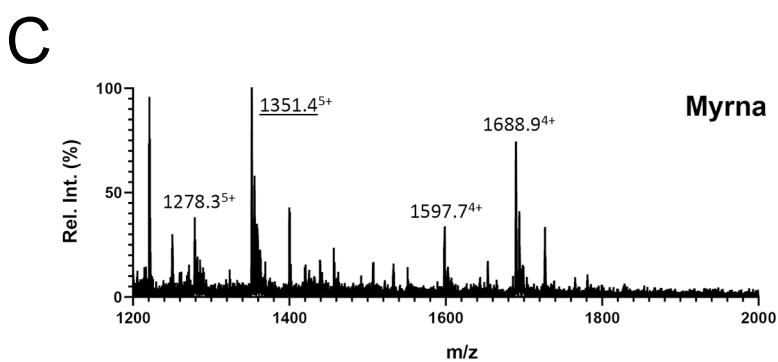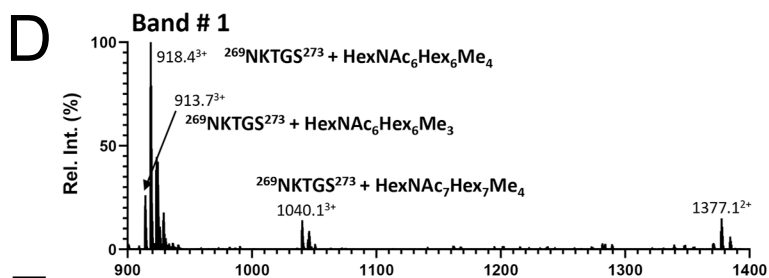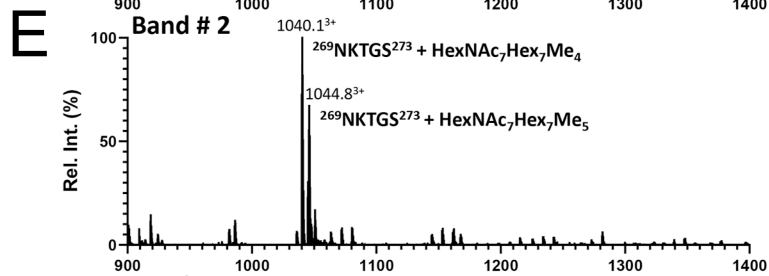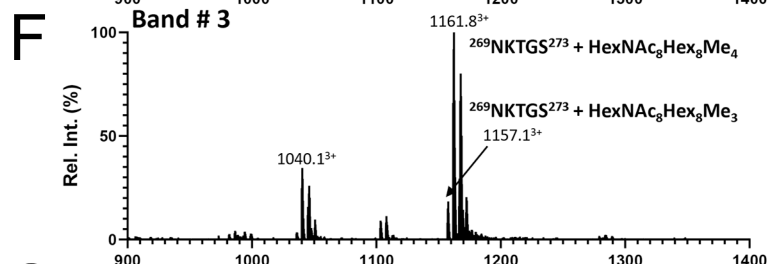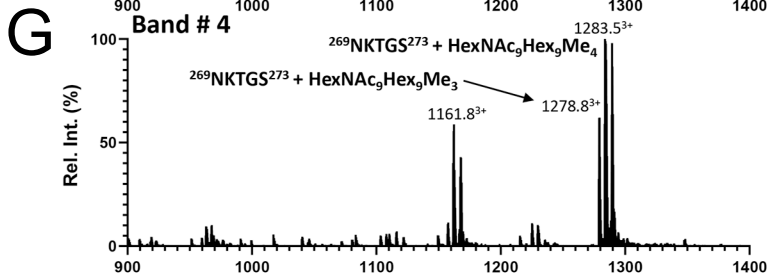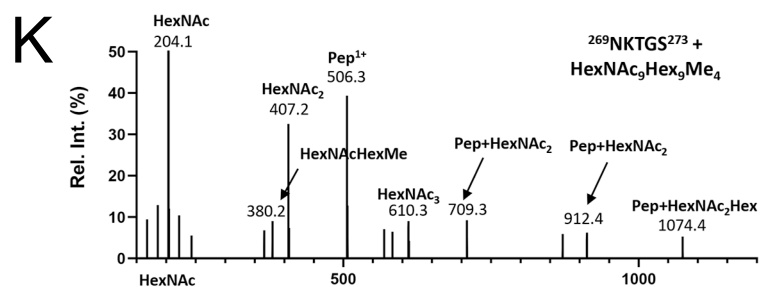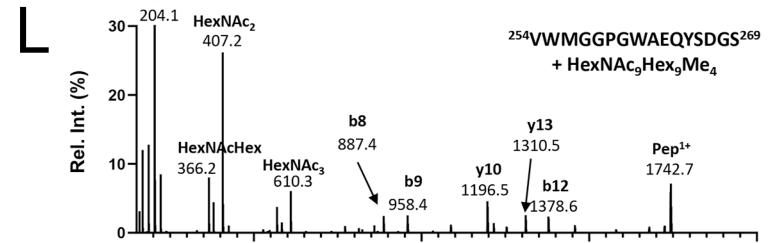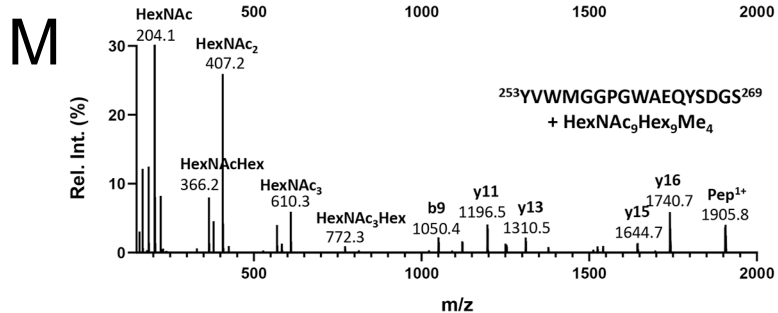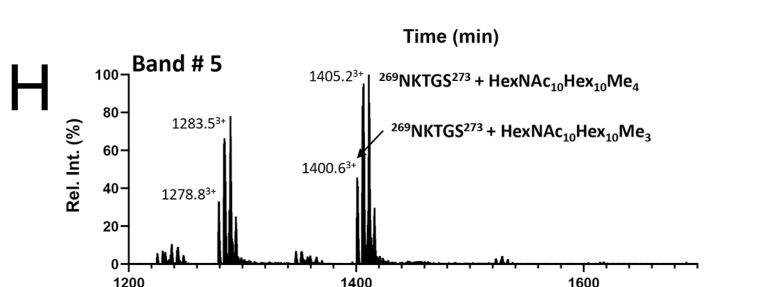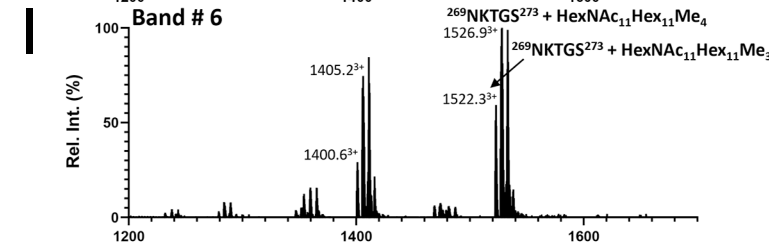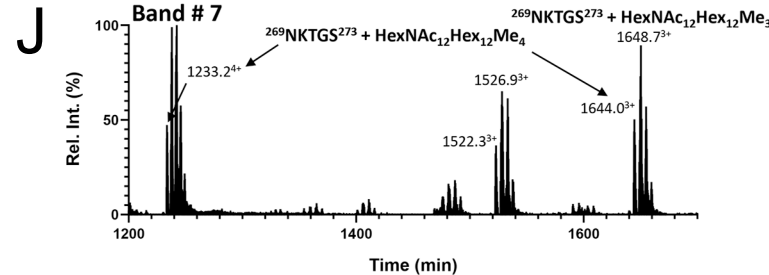

Figure S1

**Figure S2. ELISA curves at each timepoint for individual animals in C57BL/6J mouse**

**study, related to Figures 4 and 5. A.** For each individual mouse (Table S3), binding antibodies of IgM isotype are quantified by ELISA OD<sub>450</sub> versus serum dilutions. Binding to uncoated wells as a background measurement is quantified by the black and gray data/lines while binding to wild-type (wt) and mutant ( $\Delta 110-1$ ) Che8 are shown in red and blue, respectively. Logistic fits of the data yield half-maximal serum dilutions. These values are used only for datasets with at least one datapoint > 4X the background level established by the uncoated wells; for any dataset not meeting this signal:noise threshold, the half-maximal value is set of 1 (half the limit of quantitation). **B.** Binding antibodies of IgG isotype, with data display, fitting, and analysis as in A.

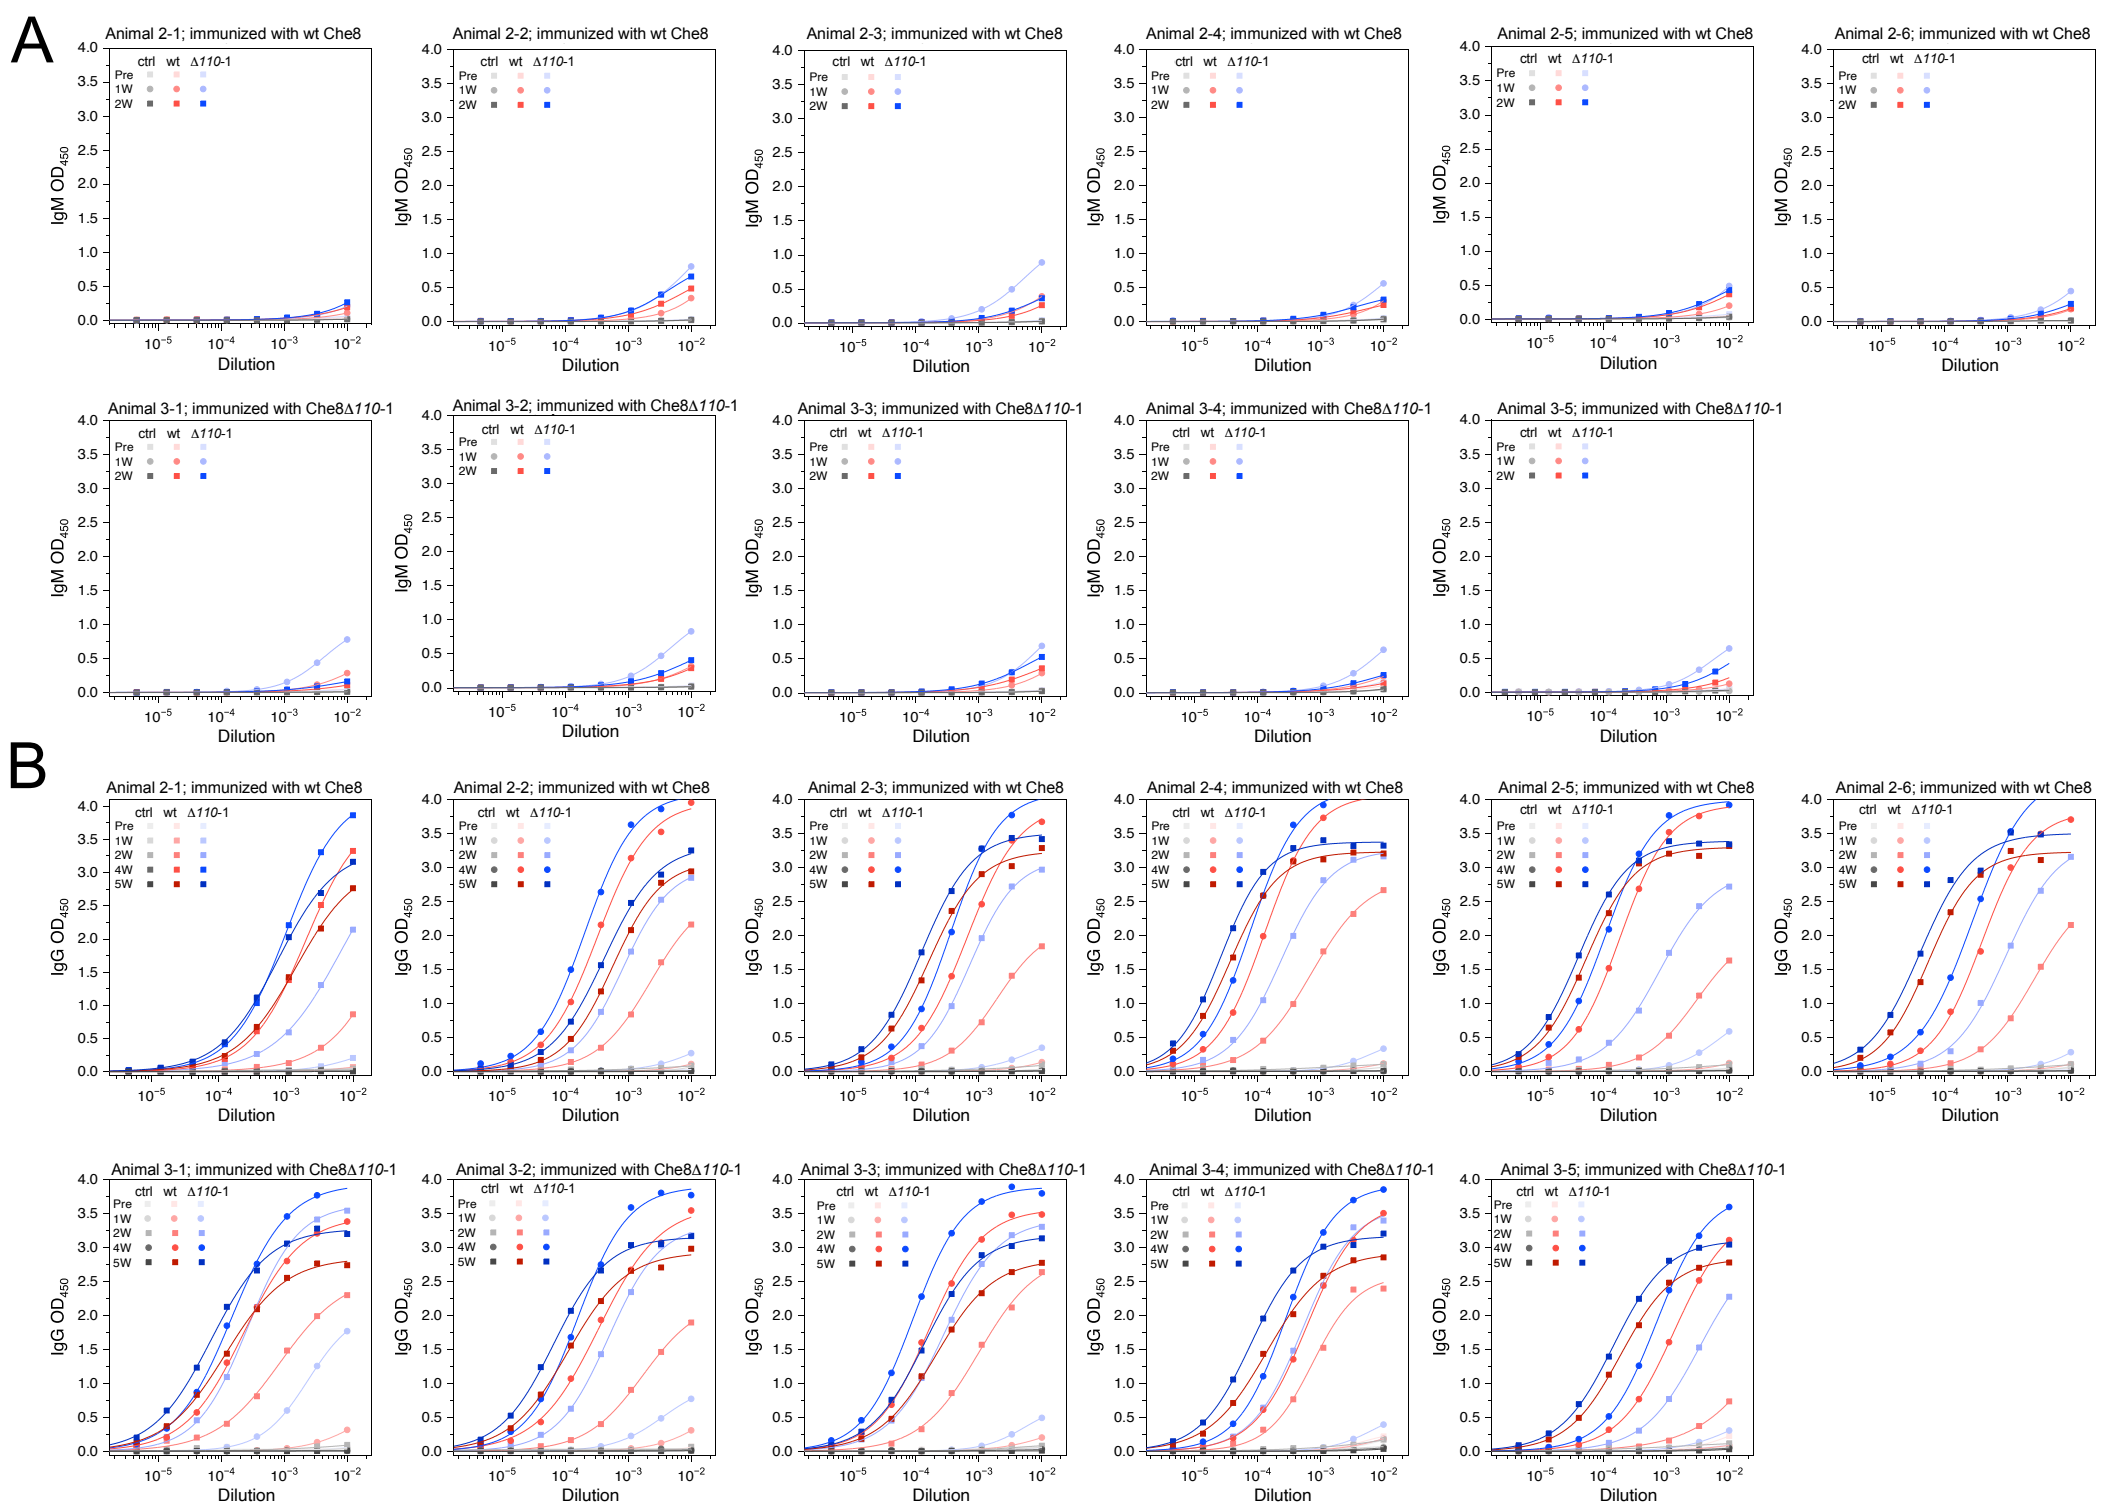

Figure S2

**Figure S3. Neutralization assay spot titer plates for C57BL/6J mouse study, related to Figures 4 and 5.** The neutralizing power of serum from each individual mouse inoculated with phage (Table S3) was assessed by incubating  $10^9$  pfu/mL of each phage with a 1:10 dilution of each serum sample. After 24 hours, the samples were serially diluted and 2uL of each dilution was spotted on bacterial lawns. Neutralization at each timepoint, from pre-phage (Pre) through Week 5 (5W), is shown. A no-serum control is also shown. The left side of the figure shows neutralization of both phages (as indicated with labels at the top) by serum from mice receiving glycosylated, wild-type Che8. The top right side of the figure shows neutralization by serum from mice receiving non-glycosylated Che8  $\Delta 110-1$ . The bottom right corner shows controls of phages incubated with serum from mice inoculated with PBS.

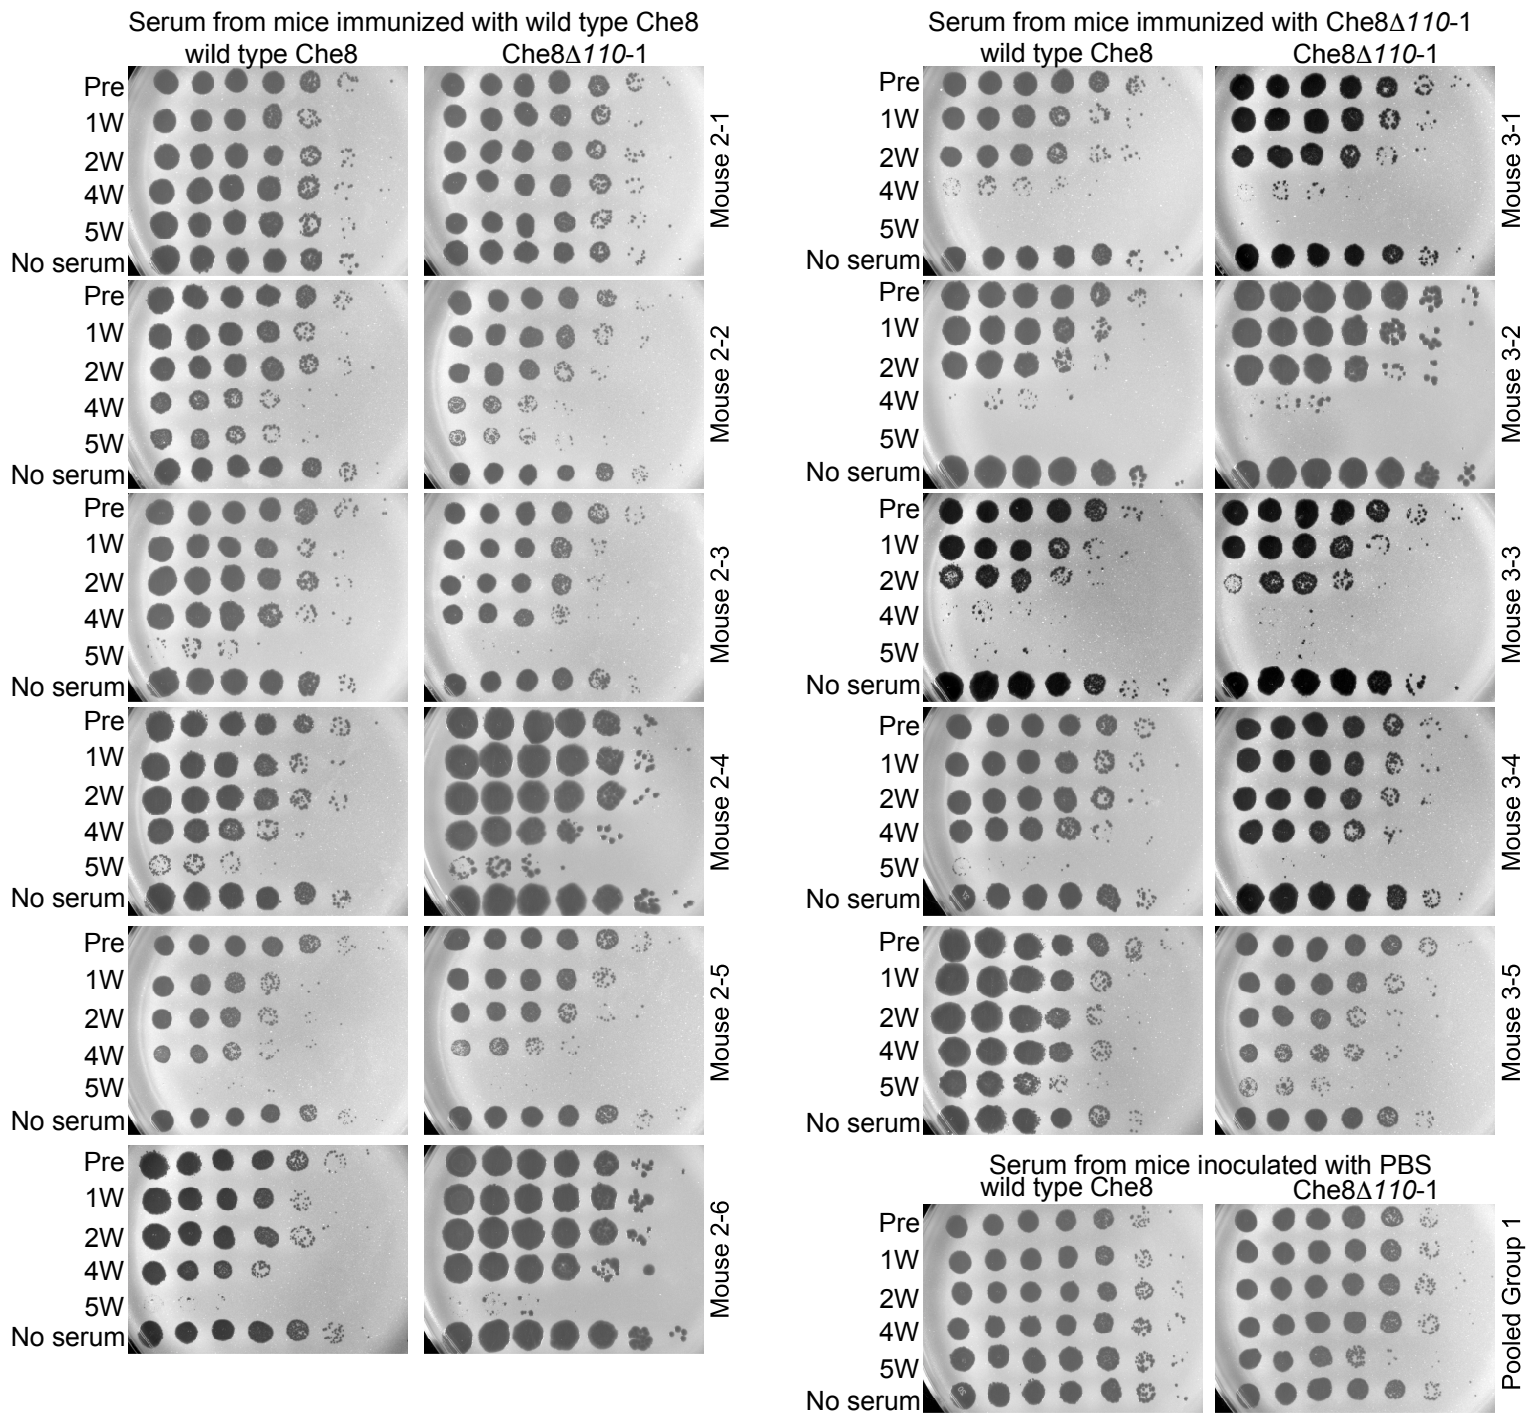

Figure S3

**Figure S4. Flow cytometry gating strategy for representative animal in both mouse**

**studies, related to Figure 4. A.** For the C57BL/6J mouse study, splenocytes were first separated from the highly fluorescent counting beads, then sorted according to size to isolate the lymphocyte population. Live and dead lymphocytes were separated with Live/Dead stain and live cells were further plotted as cell height by cell area to gate the diagonal of single cells. From there, live, single lymphocytes were sorted by B220 and CD19 signals to gate B cells (B220<sup>+</sup> CD19<sup>+</sup>) and non-B cells (B220<sup>-</sup> CD19<sup>-</sup>). The non-B cells were further plotted by NK1.1 and CD3 signals, allowing gating of the natural killer cells (CD3<sup>-</sup> NK1.1<sup>+</sup>) and T cells (CD3<sup>+</sup>). T cell subsets were identified by plotting the CD3<sup>+</sup> population by CD4 and CD8 signals; helper T cell (CD4<sup>+</sup>) and cytotoxic T cell (CD8<sup>+</sup>) populations were gated as shown. Within the CD4<sup>+</sup> population, plotting by FOXP3 signal allows gating of the regulatory T cells (FOXP3<sup>+</sup>). Finally, the subtypes of CD8<sup>+</sup> populations were quantified by plotting by CD62L and CD44 signals and dividing the plot into quadrants for effector (CD62L<sup>high</sup>CD44<sup>low</sup>), central memory (CD62L<sup>high</sup>CD44<sup>high</sup>), naïve (CD62L<sup>low</sup>CD44<sup>high</sup>), and P4 (CD62L<sup>low</sup>CD44<sup>low</sup>) T cells. **B.** For the second mouse study the gating was performed as above except the non-B cells were first plotted by the CD3 signal, allowing gating of T cells (CD3<sup>+</sup>) and CD3<sup>-</sup> cells, then CD3<sup>-</sup> cells were further gated into a population of natural killer cells (CD3<sup>-</sup> NK1.1<sup>+</sup>),

**A**

Gating all live, single lymphocytes:

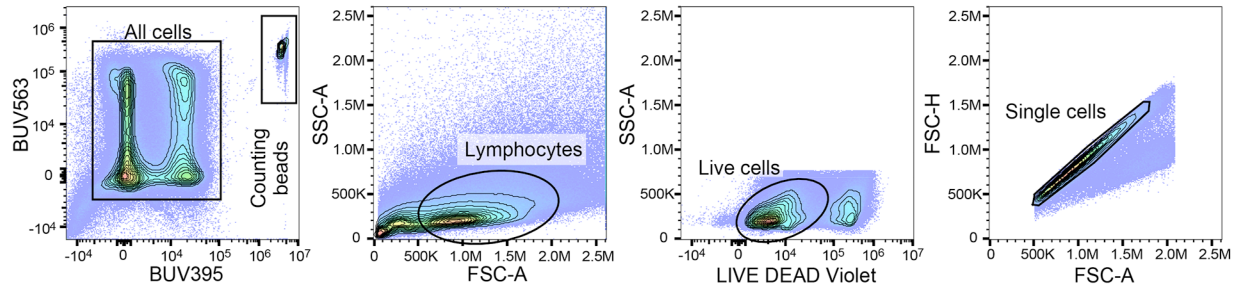

Gating B cells:

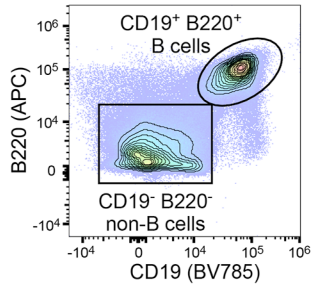

Gating non-B cells:

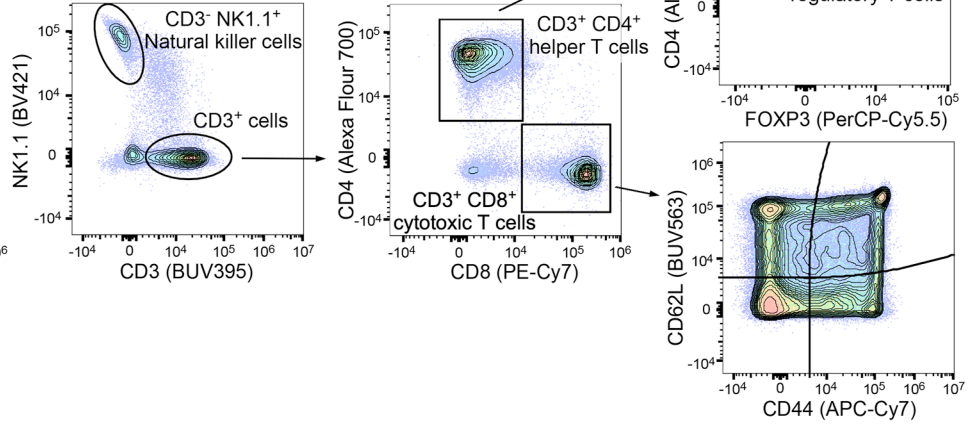**B**

Gating all live, single lymphocytes:

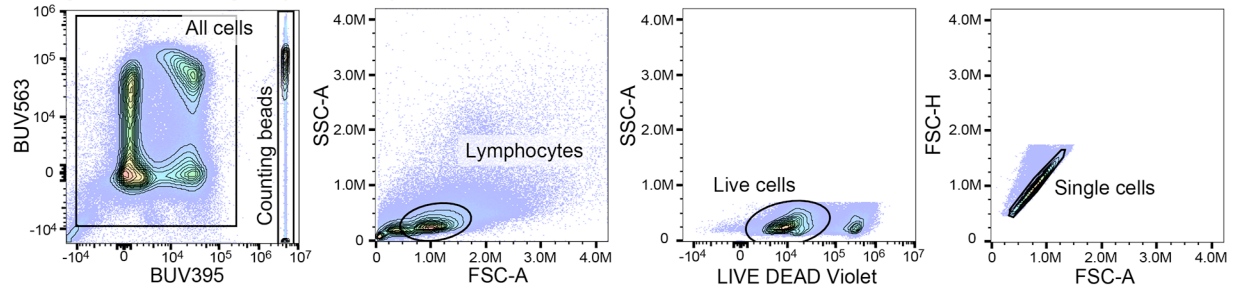

Gating B cells:

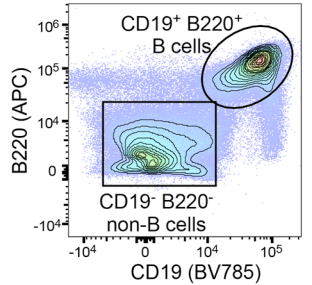

Gating non-B cells:

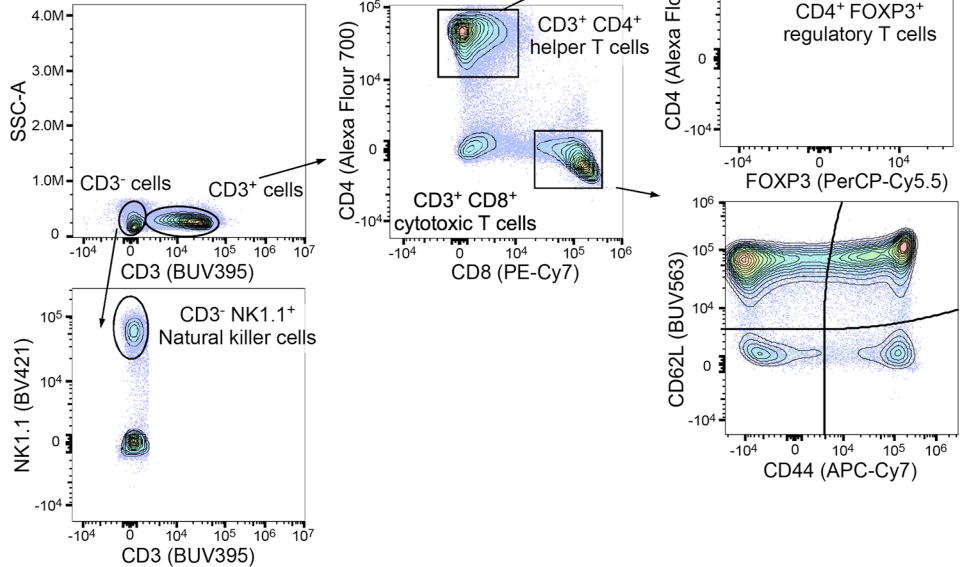

Figure S4



**Figure S5. Mouse study with B6-like IFN $\beta$  reporter mice, related to Figures 4 and 5. A.** A graphical timeline of the mouse study. At day 0, groups of four male mice and one female mouse received 1  $\mu$ g of either wild-type (wt) Che8 or the non-glycosylated mutant, Che8  $\Delta$ 110-1 (Table S3). Serum was collected from each mouse via submandibular bleed before phage administration and one, two, three, four, and six weeks post-administration. A second dose of phage was given to each mouse at 7.5 weeks, after a cheek bleed. The mice were sacrificed at week 8.5 and terminal serum and spleens were harvested. **B and C.** IgM (B) and IgG (C) titers were tracked with ELISAs using serum from each mouse receiving phage at each timepoint, as labelled below each plot. For these and all later panels with box and data plots, measurements from individual mice are shown as datapoints and the mean values are shown with a line. The box extends the mean value  $\pm$  1 standard error. Measurements below the limit of detection were set to half of the limit of detection ( $1\log_{10}$  for ELISAs and  $-7\log_{10}$  for neutralization assays) to allow statistical analysis. Two sample t-tests were performed between relevant pairs to evaluate significance, and any significant differences between related pairs of measurements are indicated with *P* values. The half-maximal titers ( $\log_{10}$ ) of serum antibodies binding wild-type Che8 (red) and Che8  $\Delta$ 110-1 (blue) are shown. **D.** Neutralization assays with an input phage titer of  $1 \times 10^9$  pfu/mL and a final serum dilution of 1:10. The efficiency of plaquing is plotted as a function of time for wt Che8 (left) and Che8  $\Delta$ 110-1 (right). Each panel presents the neutralization by sera from the three groups of mice, as indicated in the legend. **E.** Western blots to test reactivity to wild-type (wt, red) and mutant ( $\Delta$ , blue) were performed with week 8.5 serum from each experimental mouse. Exposures are the same for all blots. **F.** Multicolor flow cytometry was performed with splenocytes after sacrifice at week 8.5 and the data were gated according to the strategy in Figure S4.

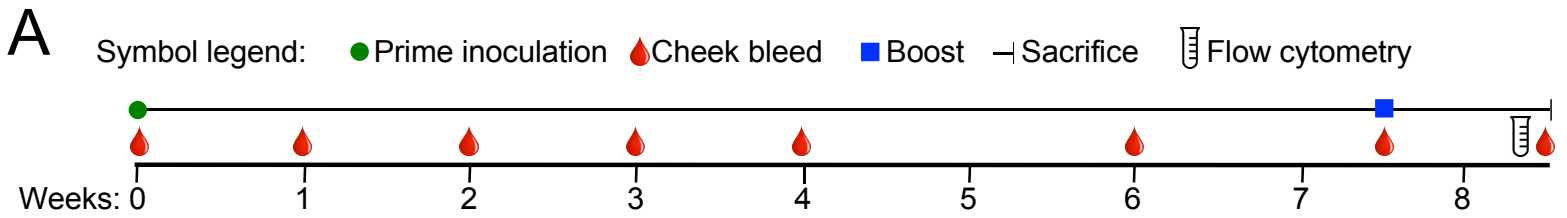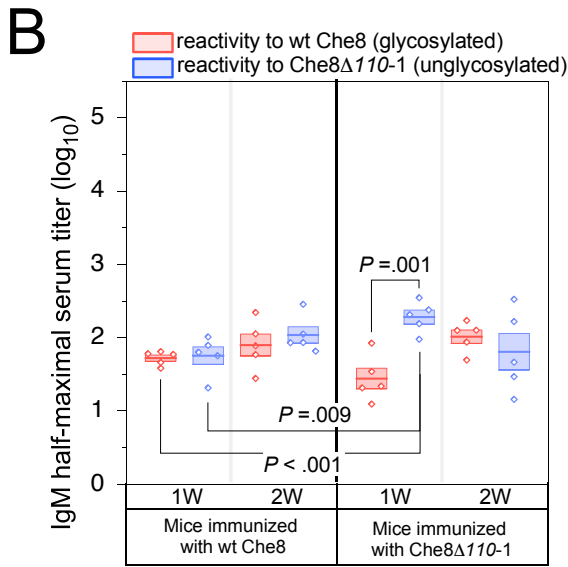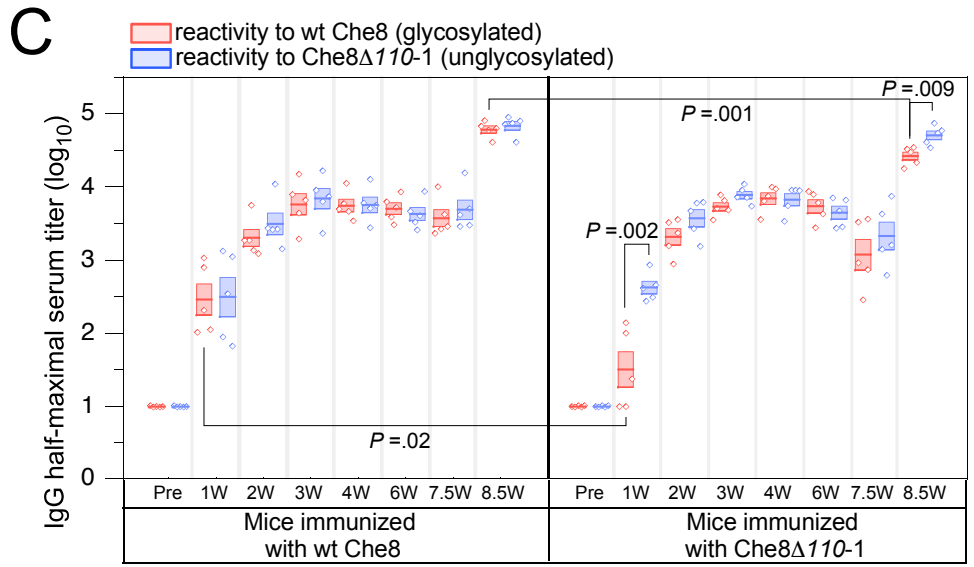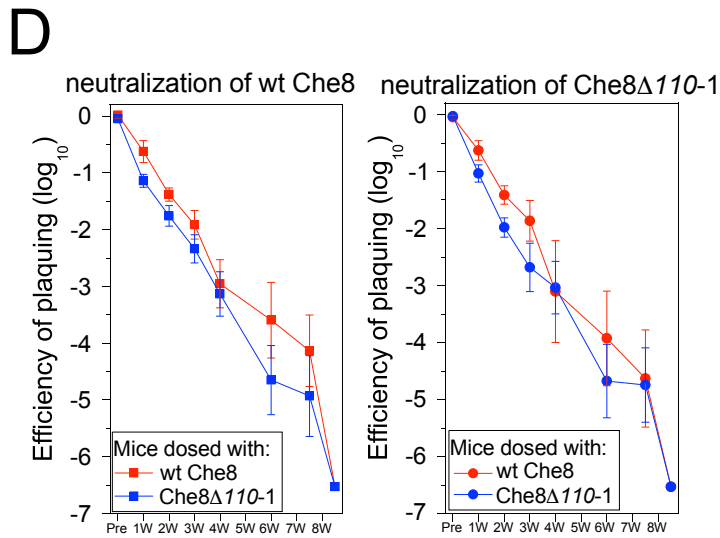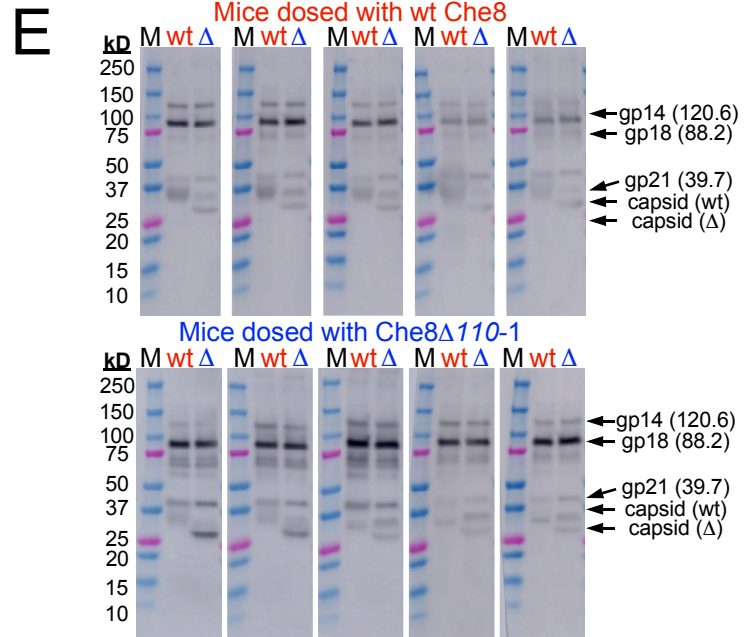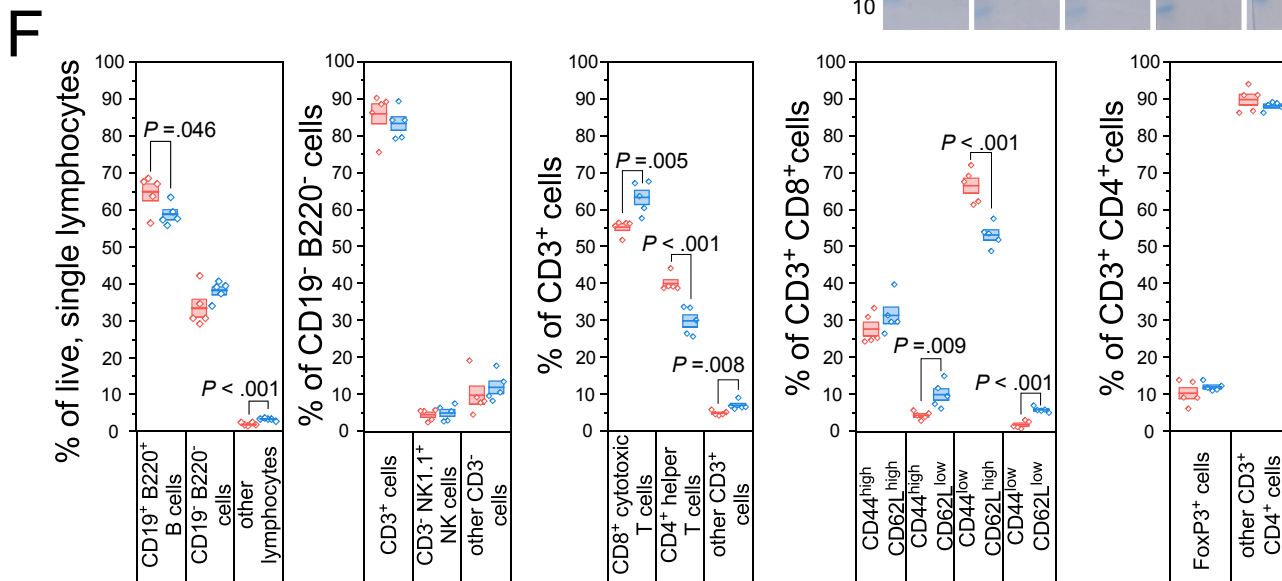

Figure S5

**Figure S6. ELISA curves at each timepoint for individual animals in B6-like IFN $\beta$  reporter mouse study, related to Figures 4 and 5. A.** For each individual mouse (Table S3), binding antibodies of IgM isotype are quantified by ELISA OD<sub>450</sub> versus serum dilutions. Binding to uncoated wells as a background measurement is quantified by the black and gray data/lines while binding to wild-type (wt) and mutant ( $\Delta 110-1$ ) Che8 are shown in red and blue, respectively. Logistic fits of the data yield half-maximal serum dilutions. These values are used only for datasets with at least one datapoint > 4X the background level established by the uncoated wells; for any dataset not meeting this signal:noise threshold, the half-maximal value is set of 1 (half the limit of quantitation). **B.** Binding antibodies of IgG isotype, with data display, fitting, and analysis as in A.

**A**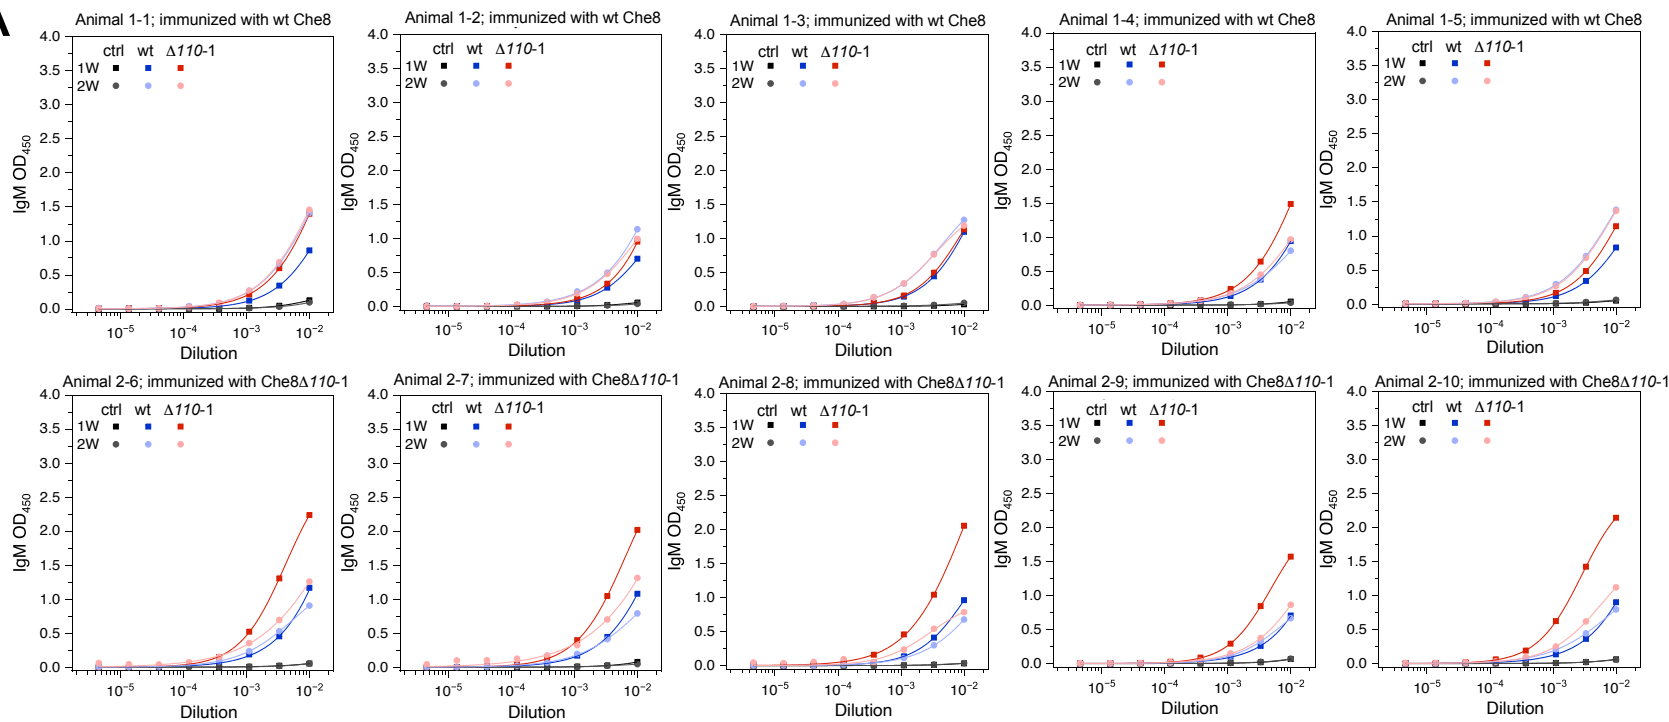**B**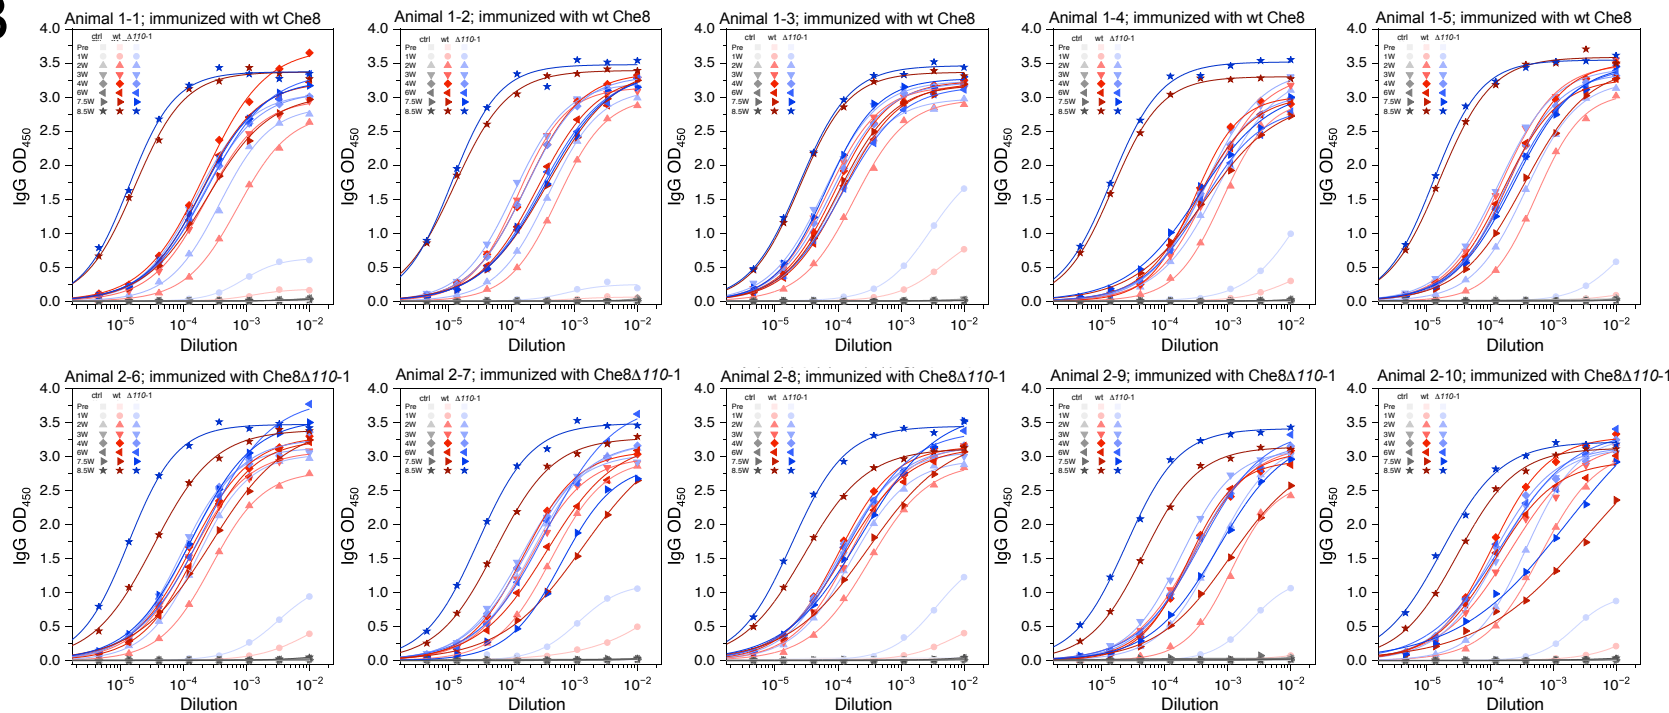

Figure S6

**Figure S7. Neutralization assay spot titer plates for B6-like IFN $\beta$  reporter mouse study, related to Figures 4 and 5.** The neutralizing power of serum from each individual mouse (Table S3) inoculated with phage was assessed by incubating  $10^9$  pfu/mL of each phage with a 1:10 dilution of each serum sample. After 24 hours, the samples were serially diluted and 2 $\mu$ L of each dilution was spotted on bacterial lawns. Neutralization at each timepoint, from pre-phage (Pre) through Week 8.5 (8.5W), is shown. A no-serum control is also shown. The left side of the figure shows neutralization of both phages (as indicated with labels at the top) by serum from mice receiving glycosylated, wild-type Che8. The top right side of the figure shows neutralization by serum from mice receiving non-glycosylated Che8  $\Delta 110-1$ .

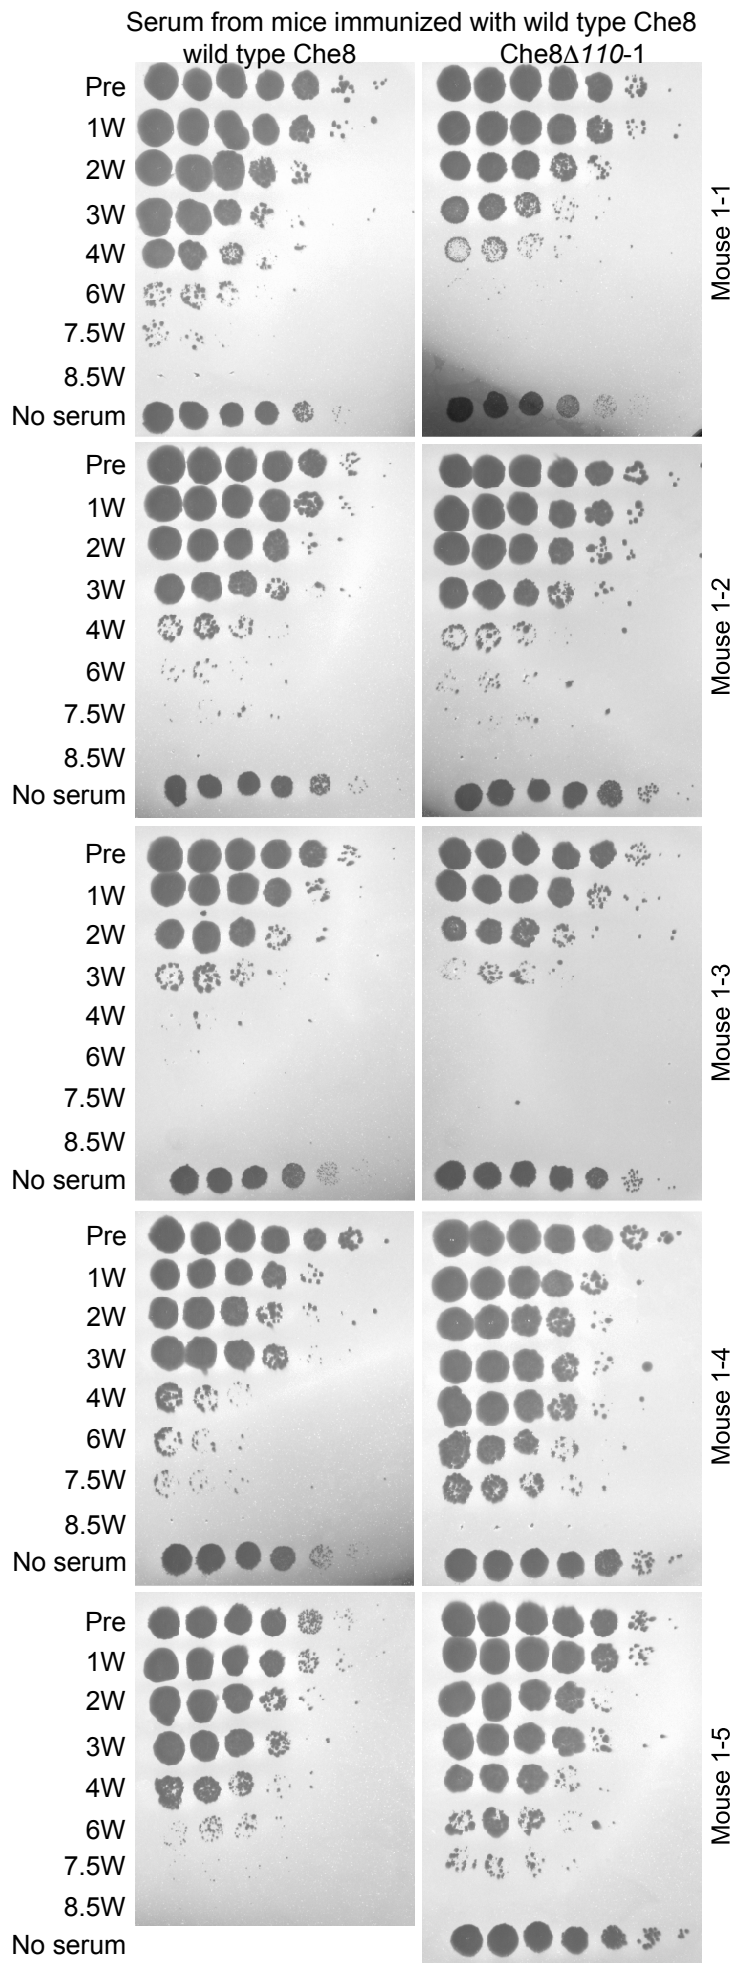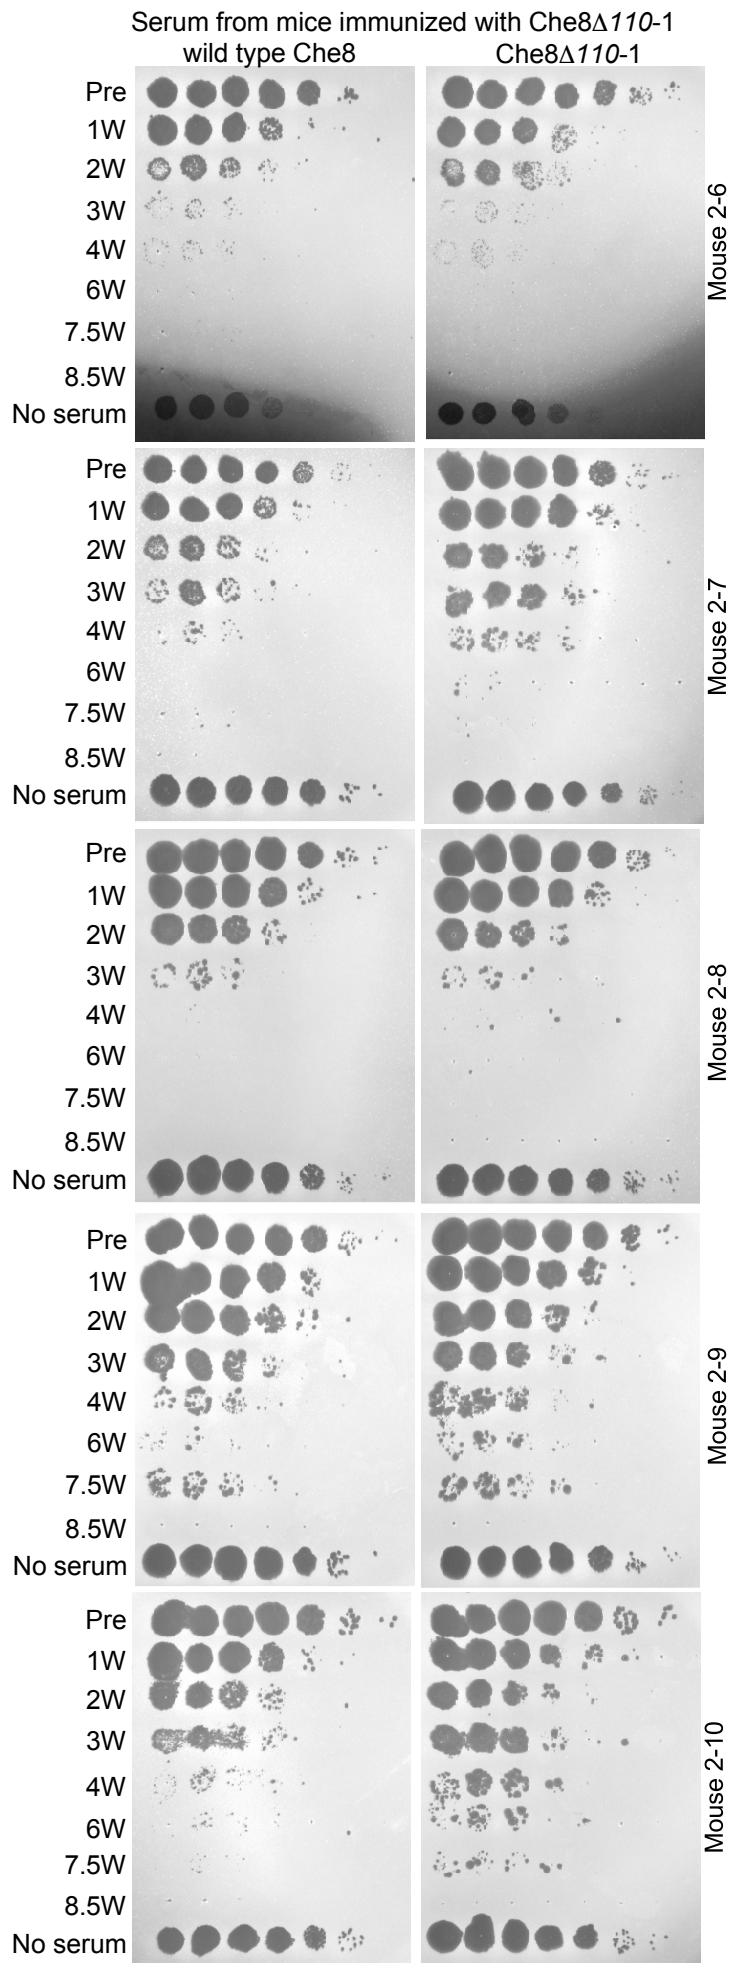

Figure S7
